# Supplementary material for: Insights of warm-cloud biases in Community Atmospheric Model 5 and 6 from the single-column modeling framework and Aerosol and Cloud Experiments in the Eastern North Atlantic (ACE-ENA) observations
Source: Copernicus journal article supplement (doi:10.5194/acp-23-8591-2023), 2023-08-04
Supplement: Supplementary file 1 [file acp-23-8591-2023-supplement.pdf]

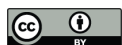

*Supplement of*

**Insights of warm-cloud biases in Community Atmospheric Model 5 and 6 from the single-column modeling framework and Aerosol and Cloud Experiments in the Eastern North Atlantic (ACE-ENA) observations**

**Yuan Wang et al.**

*Correspondence to:* Yuan Wang (yzwang@stanford.edu)

The copyright of individual parts of the supplement might differ from the article licence.

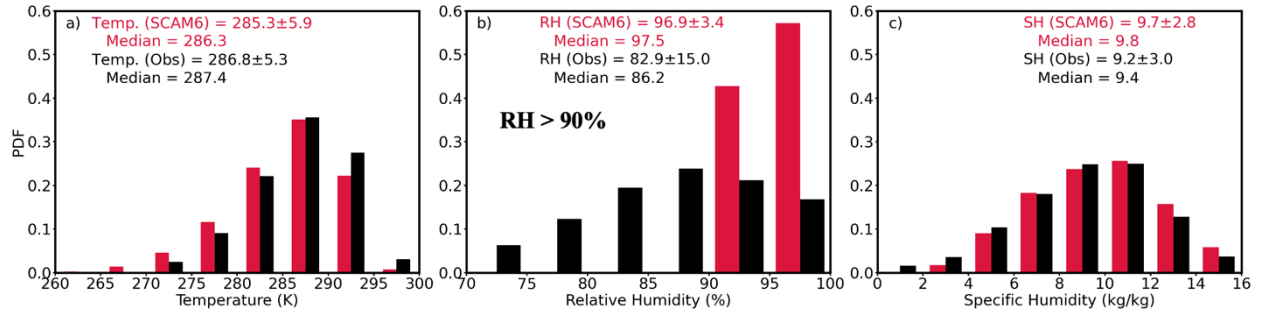

**Figure S1.** The same with Fig. 1c-d but for the grids with RH larger than 90%.

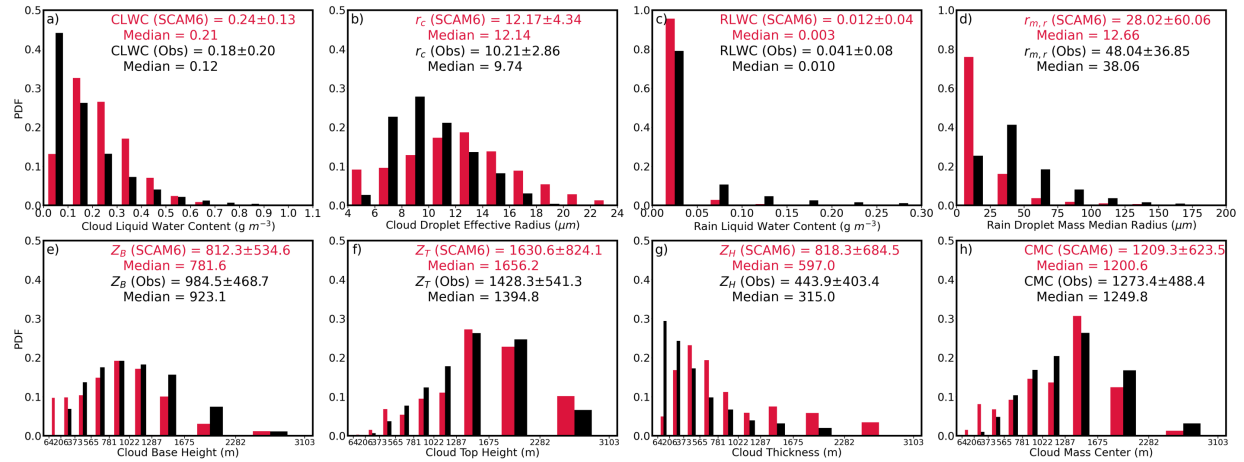

**Figure S2.** The same with Fig. 3 but the samples are selected based on the criteria of consecutive cloud layers lasting more than 2 hours with the cloud top heights less than 3 km, in order to strictly focus on the signals of stratus and stratocumulus clouds.

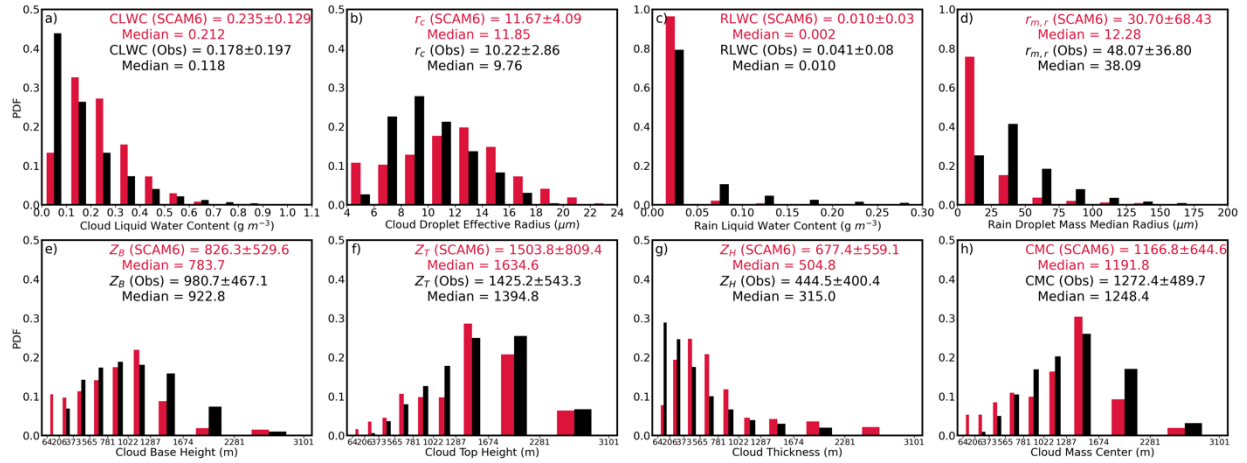

**Figure S3.** The same with Fig. 3 but for the sensitivity experiment in which all moisture related variables (both state variables and tendency terms) are scaled down by a factor of 0.85 in the large-scale forcing dataset to remedy the biases in the forcing.

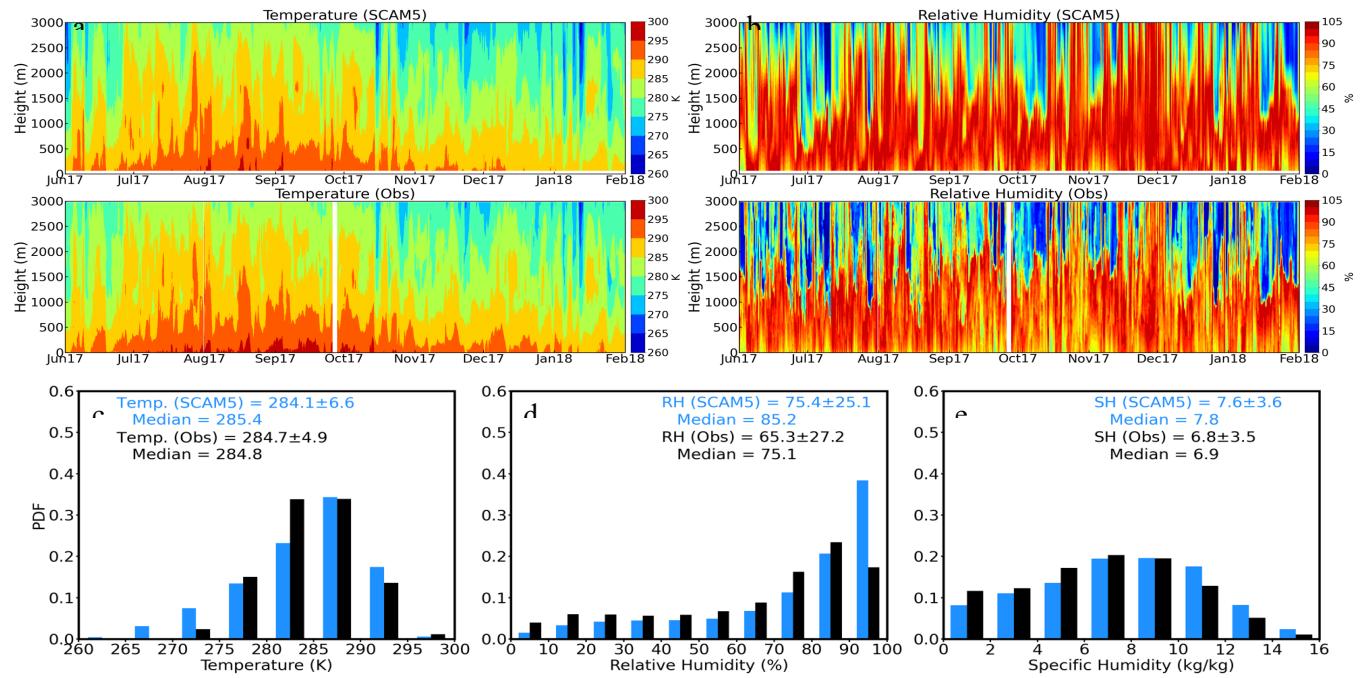

**Figure S4.** The same with Fig. 1 but for SCAM5.

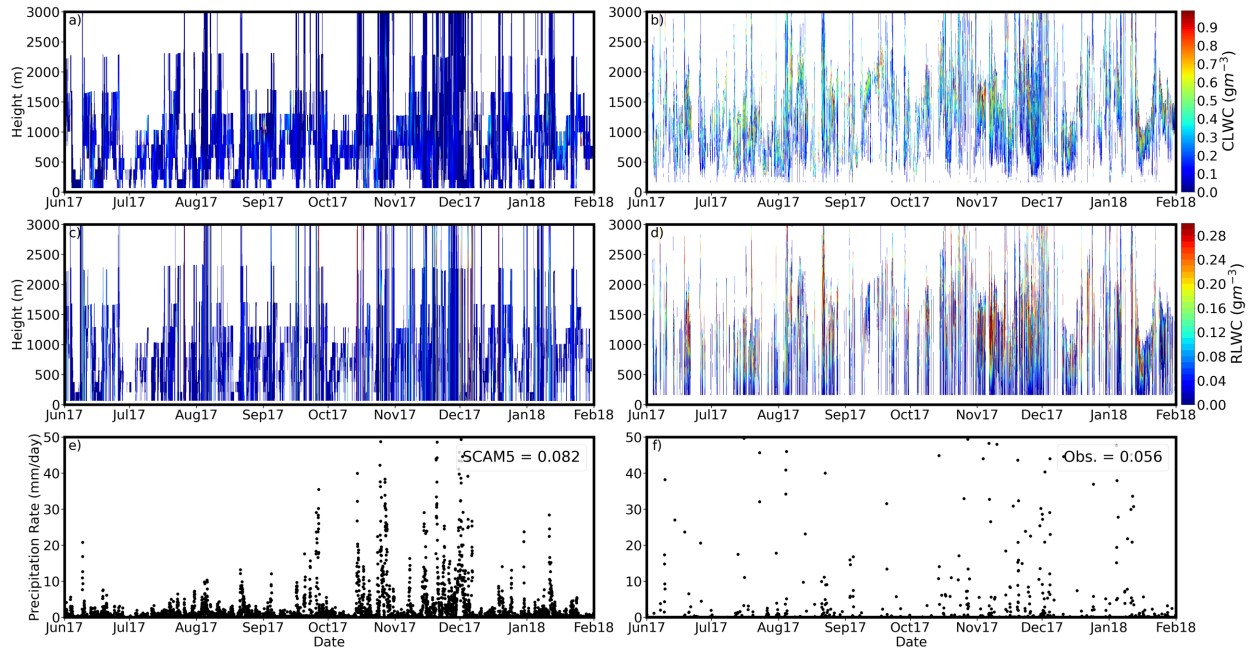

**Figure S5.** The same with Fig. 2 but for SCAM5.

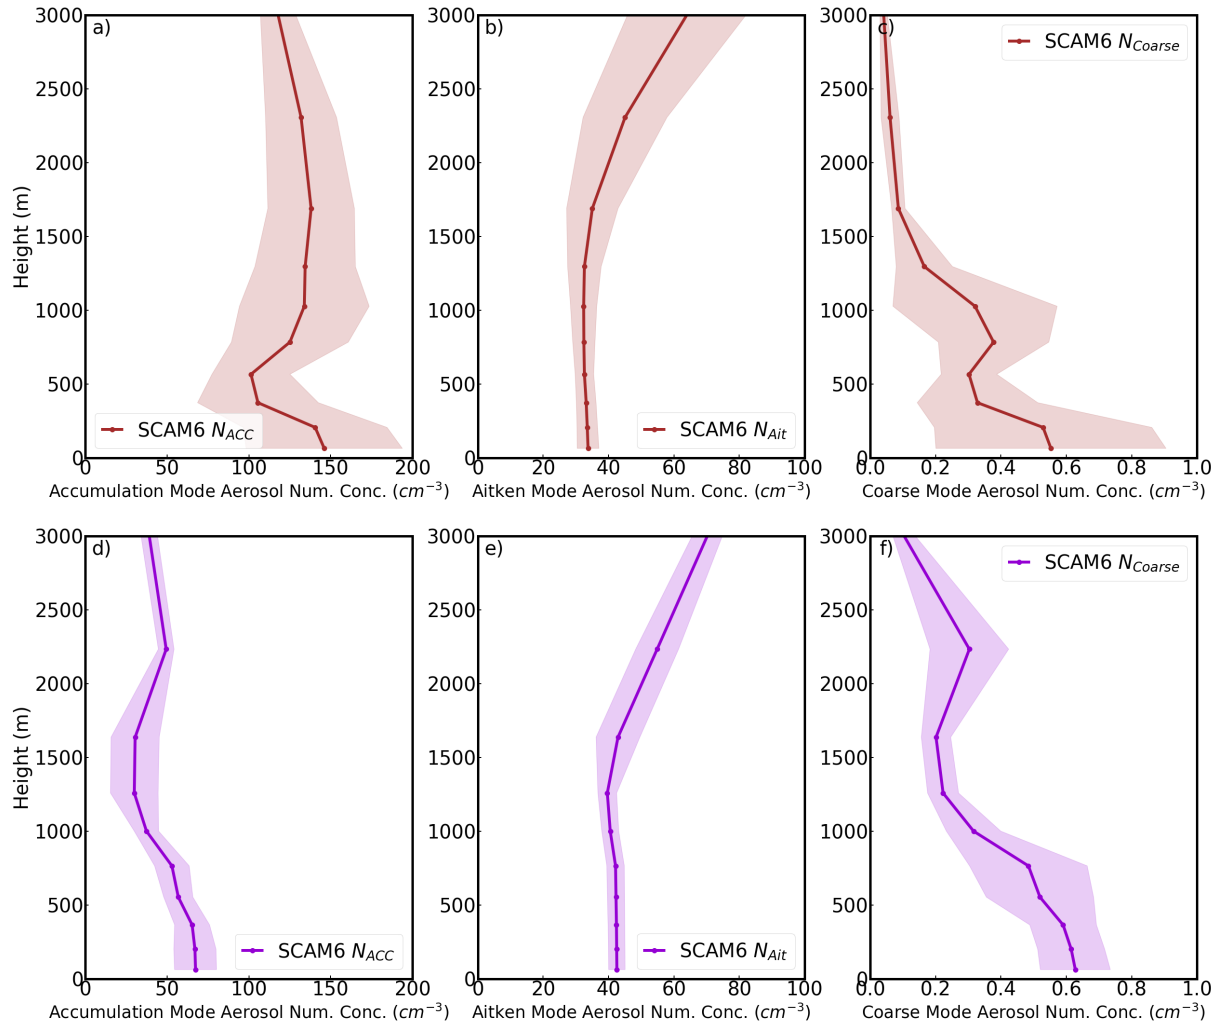

**Figure S6.** Vertical profiles of SCAM6 simulated aerosol number concentrations of Aitken mode (a, d); Accumulation mode (b, e); Coarse mode (c, f), during the Summer (brown) and Winter (purple) ACE-ENA IOPs.

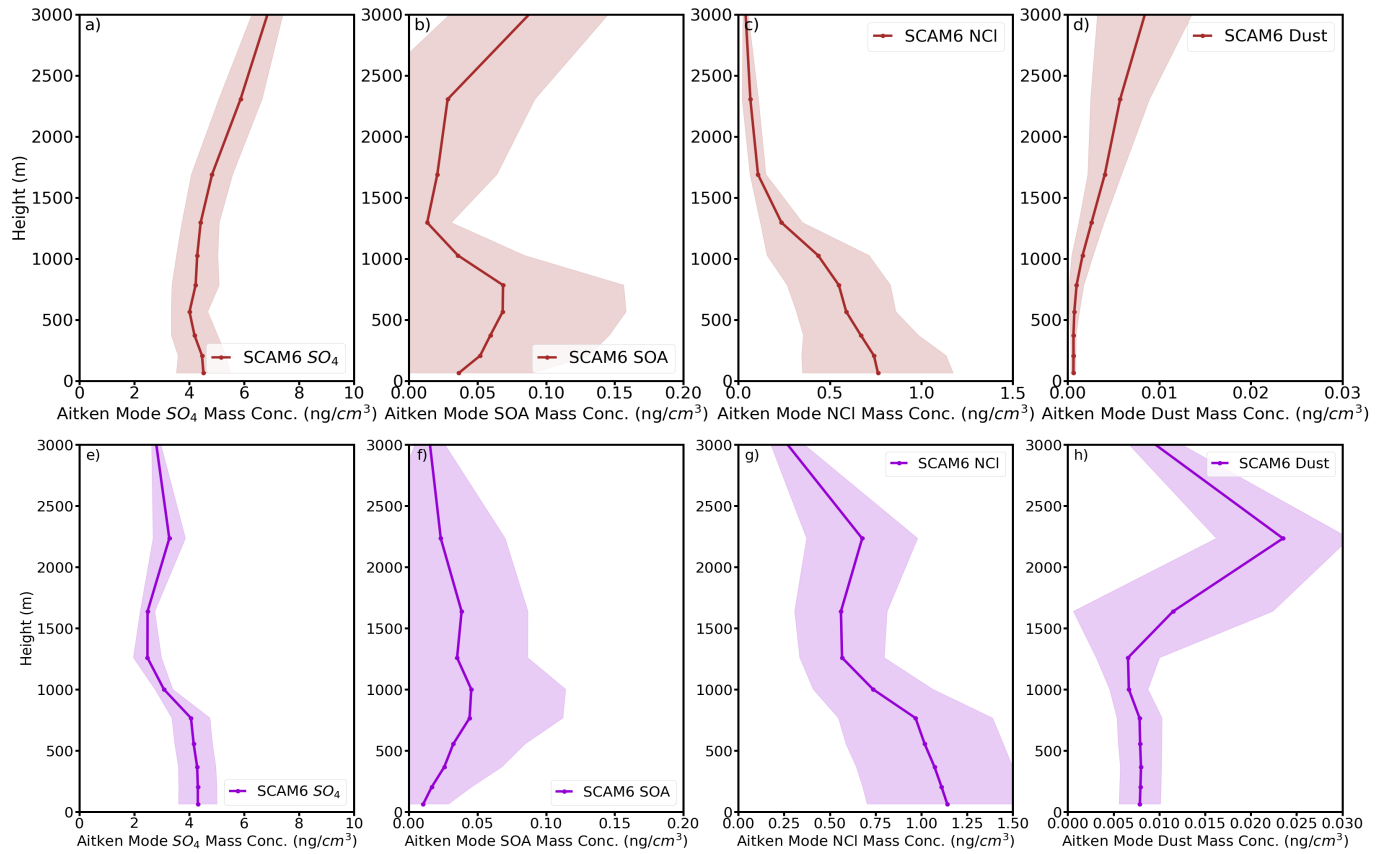

**Figure S7.** Vertical profiles of SCAM6 simulated Aitken mode aerosol chemical component mass concentrations of sulfate (a, e); SOA (b, f); NCI (c, g); Dust (d, h), during the Summer (brown) and Winter (purple) ACE-ENA IOPs.

**Table S1.** Date, starting and ending hours of the aircraft research flight selection during the ACE-ENA

| Research Flight Date | Starting Hour (UTC) | Ending Hour (UTC) |
|----------------------|---------------------|-------------------|
| 20170626             | 9.65                | 11.60             |
| 20170628             | 9.65                | 12.20             |
| 20170630             | 9.80                | 11.60             |
| 20170703             | 11.00               | 14.20             |
| 20170704             | 9.00                | 10.60             |
| 20170706             | 8.90                | 11.60             |
| 20170711             | 10.60               | 13.70             |
| 20170712             | 9.50                | 12.60             |
| 20170713             | 9.30                | 11.90             |
| 20170715             | 12.50               | 14.20             |
| 20170718             | 9.10                | 11.90             |
| 20170720             | 8.90                | 10.90             |
| 20180119             | 12.80               | 15.55             |
| 20180124             | 13.50               | 14.70             |
| 20180125             | 11.50               | 13.85             |
| 20180129             | 10.00               | 13.00             |
| 20180130             | 10.00               | 13.50             |
